# Supplementary material for: Silver-catalyzed three-component reaction of uracils, arylboronic acids, and selenium: synthesis of 5-arylselanyluracils
Source: Royal Society of Chemistry journal article supplement (doi:10.1039/d2ra01685k), 2022-01-01

**Supporting Information**  
**Silver-Catalyzed Three-Component Reaction of Uracils,**  
**Arylboronic acids, and Selenium: Synthesis of**  
**5-arylselanyluracils**

Yuki Murata,<sup>a</sup> Saori Tsuchida,<sup>a</sup> Rena Nezaki,<sup>a</sup> Yuki Kitamura,<sup>a</sup> Mio Matsumura\*<sup>a</sup>, and  
Shuji Yasuike\*<sup>a</sup>

<sup>a</sup>*School of Pharmaceutical Sciences, Aichi Gakuin University, 1-100 Kusumoto-cho, Chikusa-ku,  
Nagoya 464-8650, Japan*

E-mail: Mio Matsumura - m-matsu@dpc.agu.ac.jp

Shuji Yasuike - s-yasuik@dpc.agu.ac.jp

\* Corresponding authors

## Contents

|                                                               |    |
|---------------------------------------------------------------|----|
| 1. General information                                        | S2 |
| 2. General procedure for the synthesis of 5-arylselanyluracil | S2 |
| 3. Single crystal X-ray diffraction experiment                | S3 |
| 4. Reference                                                  | S4 |
| 5. <sup>1</sup> H NMR and <sup>13</sup> C NMR spectra         | S5 |

## 1. General Information

All chromatographic separations were accomplished with Silica Gel 60N (Kanto Chemical Co., Inc.). Thin-layer chromatography (TLC) was performed with Macherey-Nagel Sil G25 UV<sub>254</sub> pre-coated TLC plates. Reagents were used without further purification unless otherwise specified. Melting points were recorded on a Yanagimoto micro melting point hot-stage apparatus (MP-S3) and are not corrected. IR spectra were recorded on a SHIMADZU FTIR-8400S spectrophotometer and are reported in frequency of absorption (cm<sup>-1</sup>). Only selected IR peaks are reported. <sup>1</sup>H NMR (TMS:  $\delta$  = 0.00 ppm as an internal standard), <sup>13</sup>C NMR (CDCl<sub>3</sub>:  $\delta$  = 77.00 ppm and DMSO-*d*<sub>6</sub>:  $\delta$  = 39.52 ppm as an internal standard), <sup>19</sup>F NMR (trifluoromethylbenzene:  $\delta$  = -64.0 ppm as an external standard) and <sup>77</sup>Se NMR (Ph<sub>2</sub>Se<sub>2</sub>:  $\delta$  = 436.15 ppm as an internal standard) spectra were recorded on a JEOL ECZ-400S (400 MHz, 100 MHz, 376 MHz and 76 MHz) spectrometer in CDCl<sub>3</sub> and DMSO-*d*<sub>6</sub> unless otherwise stated. GC-MS (EI) spectra were recorded on Agilent 5977E Diff-SST MSD-230V spectrometer. HRMS (ESI) spectra were recorded on Agilent 6230 Accurate-Mass TOF LC/MS system. The X-ray diffraction measurements carried out using a Rigaku XtaLAB Synergy, Single source at home/near, HyPix3000 diffractometer. Spectroscopic data of 5-arylselanyluracils **5a**, **p**, **q** and **s** are in accordance with the literature.<sup>1-3</sup>

## 2. General procedure for the synthesis of 5-arylselanyluracil

Aryl boronic acid (**2**) (0.5 mmol, 1.0 eq.), Se powder (40 mg, 0.5 mmol, 1.0 eq.), AgNO<sub>3</sub> (8.5 mg, 0.05 mmol, 10 mol%), and 1,3-dimethyluracil derivative (**1**) (0.5 mmol) were added to dimethylsulfoxide (3 mL) in round-bottom flask. After stirring at 120 °C for 5-24 h, the mixture was cooled to room temperature and evaporated to dryness under reduced pressure. The crude product was purified on a silica gel column chromatography to give the desired product **5a**, **p**, **q** and **s**.

### 1,3-Dimethyl-5-(phenylselanyl)pyrimidine-2,4-(1*H*,3*H*)-dione (**5a**)<sup>1</sup>

Colorless prisms (143 mg, 96%). *R*<sub>f</sub> = 0.5 (EtOAc/hexane 1:1). mp 112–114 °C (CH<sub>2</sub>Cl<sub>2</sub>-hexane). <sup>1</sup>H NMR (400 MHz, CDCl<sub>3</sub>):  $\delta$  = 7.56–7.51 (m, 2H, Ar-H), 7.41 (s, 1H, H-6), 7.30–7.28 (m, 3H, Ar-H), 3.39 (s, 3H, *N*-CH<sub>3</sub>) 3.38 (s, 3H, *N*-CH<sub>3</sub>). <sup>13</sup>C NMR (100 MHz, CDCl<sub>3</sub>):  $\delta$  = 161.9 (s, C), 151.6 (s, C), 129.3 (s, C), 103.2 (s, C), 146.1 (s, CH), 132.6 (s, CH), 129.4 (s, CH), 127.8 (s, CH), 37.1 (s, CH<sub>3</sub>), 28.7 (s, CH<sub>3</sub>). <sup>77</sup>Se NMR (76 MHz, CDCl<sub>3</sub>):  $\delta$  = 330.4 (s). IR (KBr):  $\nu_{\max}$ /cm<sup>-1</sup> 1712 vs (C=O), 1645 vs cm<sup>-1</sup> (C=O). HRMS (ESI): *m/z* calcd for C<sub>12</sub>H<sub>12</sub>N<sub>2</sub>O<sub>2</sub>Se+H<sup>+</sup>; 297.0142 [M+H]<sup>+</sup>; found: 297.0140.

### 5-(Phenylselanyl)-2',3',5'-triacetate-uridine (**5p**)<sup>2</sup>

Colorless oil (85 mg, 32%). *R*<sub>f</sub> = 0.5 (EtOAc/hexane 2:1). <sup>1</sup>H NMR (400 MHz, CDCl<sub>3</sub>):  $\delta$  = 9.29 (s, 1H, NH), 7.76 (s, 1H, H-6), 7.52–7.48 (m, 2H, Ar-H), 7.31–7.26 (m, 3H, Ar-H), 6.09 (d, *J* = 5.5 Hz, 1H, H-1'), 5.33–5.27 (m, 2H, CH<sub>2</sub>-5'), 4.35 (q, *J* = 3.2 Hz, 1H, H-2'), 4.29 (dd, *J* = 12.3, 3.2 Hz, 1H,

H-3'), 4.24 (dd,  $J = 12.6, 3.0$  Hz, 1H, H-4'), 2.14 (s, 3H, OAc), 2.12 (s, 3H, OAc), 2.10 (s, 3H, OAc).  $^{13}\text{C}$  NMR (100 MHz,  $\text{CDCl}_3$ ):  $\delta = 170.1$  (s, C), 169.6 (s, C), 161.0 (s, C), 150.2 (s, C), 143.0 (s, CH), 132.1 (s, CH), 129.5 (s, CH), 129.0 (s, C), 127.8 (s, CH), 105.4 (s, C), 87.0 (s, CH), 80.1 (s, CH), 72.9 (s, CH), 70.3 (s, CH), 63.2 (s,  $\text{CH}_2$ ), 20.8 (s,  $\text{CH}_3$ ), 20.5 (s,  $\text{CH}_3$ ), 20.4 (s,  $\text{CH}_3$ ).  $^{77}\text{Se}$  NMR (76 MHz,  $\text{CDCl}_3$ ):  $\delta = 325.4$  (s). IR (KBr):  $\nu_{\text{max}}/\text{cm}^{-1}$  1748vs (C=O), 1694vs (C=O). HRMS (ESI):  $m/z$  calcd for  $\text{C}_{21}\text{H}_{22}\text{N}_2\text{O}_9\text{Se}+\text{H}^+$ ; 527.0565  $[\text{M}+\text{H}]^+$ : found: 527.0550.

### 5-(Phenylselanyl)pyrimidine-2,4-(1*H*,3*H*)-dione (5q)<sup>1</sup>

Pale yellow needles (113 mg, 84%).  $R_f = 0.6$  (EtOAc/hexane 4:1). mp 250–253 °C ( $\text{CH}_2\text{Cl}_2$ -hexane).  $^1\text{H}$  NMR (400 MHz,  $\text{DMSO}-d_6$ ):  $\delta = 11.4$  (s, 1H, N-H), 11.2 (s, 1H, N-H), 7.77 (s, 1H, H-6), 7.36 (dt,  $J = 6.9, 1.4$  Hz, 2H, Ar-H), 7.28 (tt,  $J = 6.6, 1.4$  Hz, 2H, Ar-H), 7.23 (tt,  $J = 7.3, 1.4$  Hz, 1H, Ar-H).  $^{13}\text{C}$  NMR (100 MHz,  $\text{DMSO}-d_6$ ):  $\delta = 162.5$  (s, C), 151.4 (s, C), 148.2 (s, CH), 131.2 (s, C), 129.8 (s, CH), 129.3 (s, CH), 126.6 (s, CH), 99.6 (s, C).  $^{77}\text{Se}$  NMR (76 MHz,  $\text{DMSO}-d_6$ ):  $\delta = 301.2$  (s). IR (KBr):  $\nu_{\text{max}}/\text{cm}^{-1}$  1771vs (C=O), 1734vs (C=O). HRMS (ESI):  $m/z$  calcd for  $\text{C}_{10}\text{H}_8\text{N}_2\text{O}_2\text{Se}+\text{Na}^+$ ; 290.9649  $[\text{M}+\text{Na}]^+$ : found: 290.9649.

### 6-Chloro-1,3-dimethyl-5-(phenylselanyl)pyrimidine-2,4-(1*H*,3*H*)-dione (5s)<sup>3</sup>

Colorless plates (143 mg, 87%).  $R_f = 0.5$  (EtOAc/hexane 1:2). mp 88–90 °C ( $\text{CH}_2\text{Cl}_2$ -hexane).  $^1\text{H}$  NMR (400 MHz,  $\text{CDCl}_3$ ):  $\delta = 7.50$  (dd,  $J = 7.8, 1.8$  Hz, 2H, Ar-H), 7.27–7.24 (m, 3H, Ar-H), 3.67 (s, 3H, *N*- $\text{CH}_3$ ), 3.38 (s, 3H, *N*- $\text{CH}_3$ ).  $^{13}\text{C}$  NMR (100 MHz,  $\text{CDCl}_3$ ):  $\delta = 160.4$  (s, C), 151.7 (s, C), 150.8 (s, C), 132.0 (s, CH), 130.1 (s, C), 129.3 (s, CH), 127.6 (s, CH), 104.3 (s, C), 35.7 (s,  $\text{CH}_3$ ), 29.6 (s,  $\text{CH}_3$ ).  $^{77}\text{Se}$  NMR (76 MHz,  $\text{CDCl}_3$ ):  $\delta = 356.8$  (s). IR (KBr):  $\nu_{\text{max}}/\text{cm}^{-1}$  1701s (C=O), 1651vs (C=O). HRMS (ESI):  $m/z$  calcd for  $\text{C}_{12}\text{H}_{11}\text{N}_2\text{O}_2\text{Se}+\text{H}^+$ ; 330.9753  $[\text{M}+\text{H}]^+$ : found: 330.9755.

## 3. Single crystal X-ray diffraction experiment

The X-ray diffraction measurements of compounds **5a** was carried out using an XtaLAB Synergy, Single source at home/near, HyPix3000 diffractometer. The crystal was kept at 100 K during data collection. Using Olex2<sup>4</sup>, the structure was solved with the SHELXT<sup>5</sup> structure solution program using Intrinsic Phasing and refined with the SHELXL<sup>6</sup> refinement package using Least Squares minimisation.

Crystal Data for **5a**.  $\text{C}_{12}\text{H}_{12}\text{N}_2\text{O}_2\text{Se}$  ( $M = 295.20$  g/mol): monoclinic, space group  $P2_1/c$  (no. 14),  $a = 12.30260(10)$  Å,  $b = 10.19280(10)$  Å,  $c = 56.9658(4)$  Å,  $\beta = 94.7340(10)^\circ$ ,  $V = 7119.03(10)$  Å<sup>3</sup>,  $Z = 24$ ,  $T = 100$  K,  $\mu(\text{Cu K}\alpha) = 4.228$  mm<sup>-1</sup>,  $D_{\text{calc}} = 1.653$  g/cm<sup>3</sup>, 38140 reflections measured ( $6.228^\circ \leq 2\theta \leq 136.808^\circ$ ), 12880 unique ( $R_{\text{int}} = 0.0346$ ,  $R_{\text{sigma}} = 0.0332$ ) which were used in all calculations. The final  $R_1$  was 0.0424 ( $I > 2\sigma(I)$ ) and  $wR_2$  was 0.1006 (all data).

The experimental and refinement details of the X-ray crystallographic structures of compound can be

obtained free of charge from the Cambridge Crystallographic Data Centre (<http://www.ccdc.cam.ac.uk>), CCDC 2093049.

#### 4. Reference

- 1 X-D. Li, Y-T. Gao, Y-J. Sun, X-Y. Jin, D. Wang, L. Liu, L. Cheng, *Org. Lett.* 2019, **21**, 6643–6647.
- 2 C. H. Lee, Y. H. Kim, *Tetrahedron Lett.* 1991, **32**, 2401–2404.
- 3 M. Noikham, S. Yotphan, *Eur. J. Org. Chem.* 2019, 2759–2766.
- 4 O. V. Dolomanov, L. J. Bourhis, R. J. Gildea, J. A. K. Howard, H. Puschmann, *J. Appl. Cryst.* 2009, **42**, 339–341.
- 5 G. M. Sheldrick, *Acta Cryst.* 2015, **A71**, 3–8.
- 6 G. M. Sheldrick, *Acta Cryst.* 2015, **C71**, 3–8.

## 5. $^1\text{H}$ NMR and $^{13}\text{C}$ NMR spectra

### $^1\text{H}$ NMR of **5a**

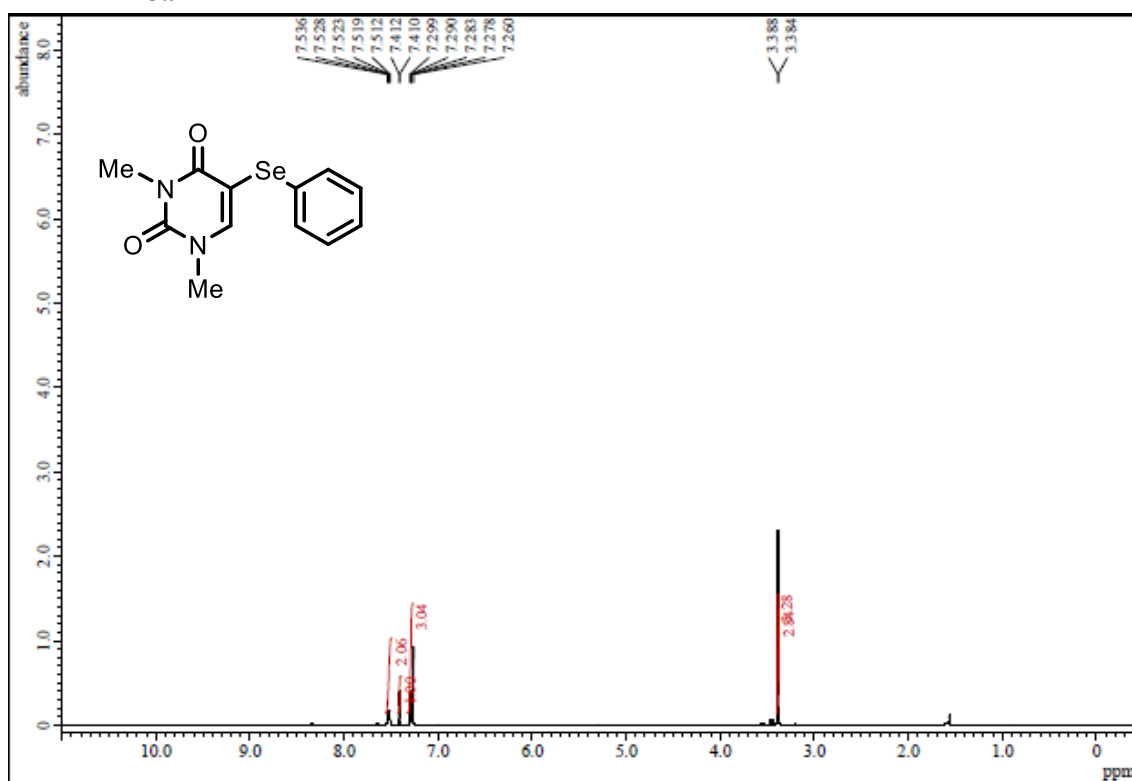

### $^{13}\text{C}$ NMR of **5a**

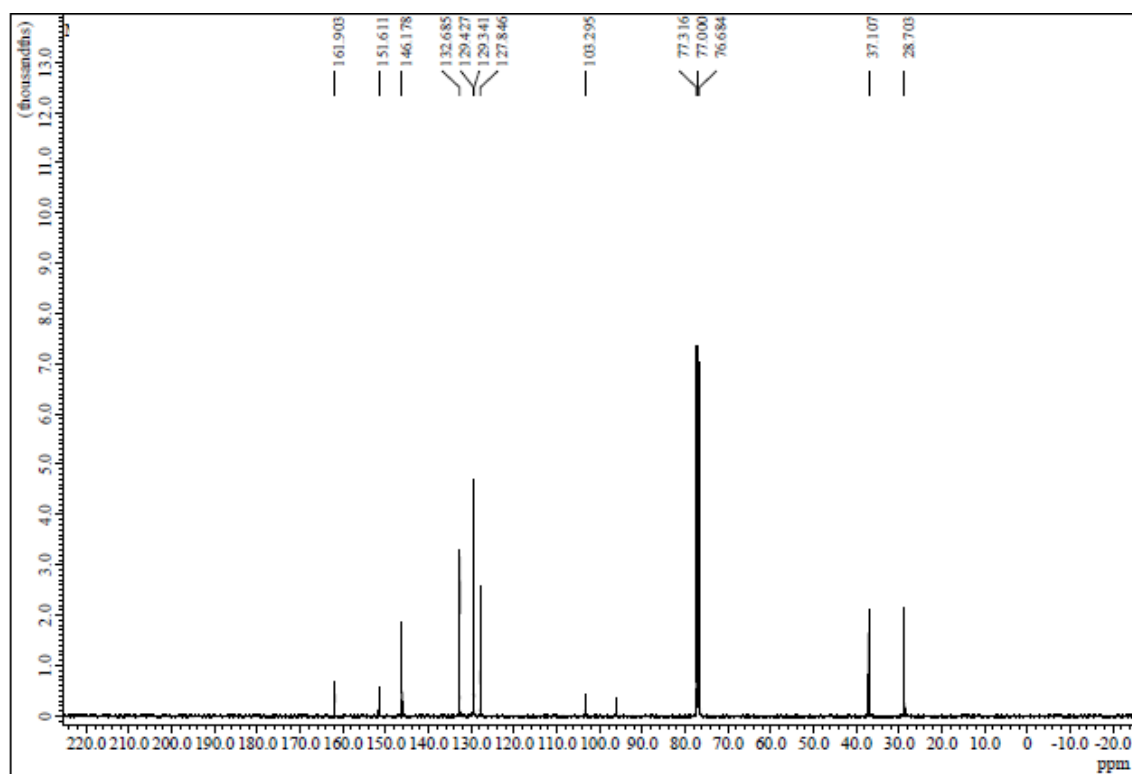

<sup>1</sup>H NMR of 5b

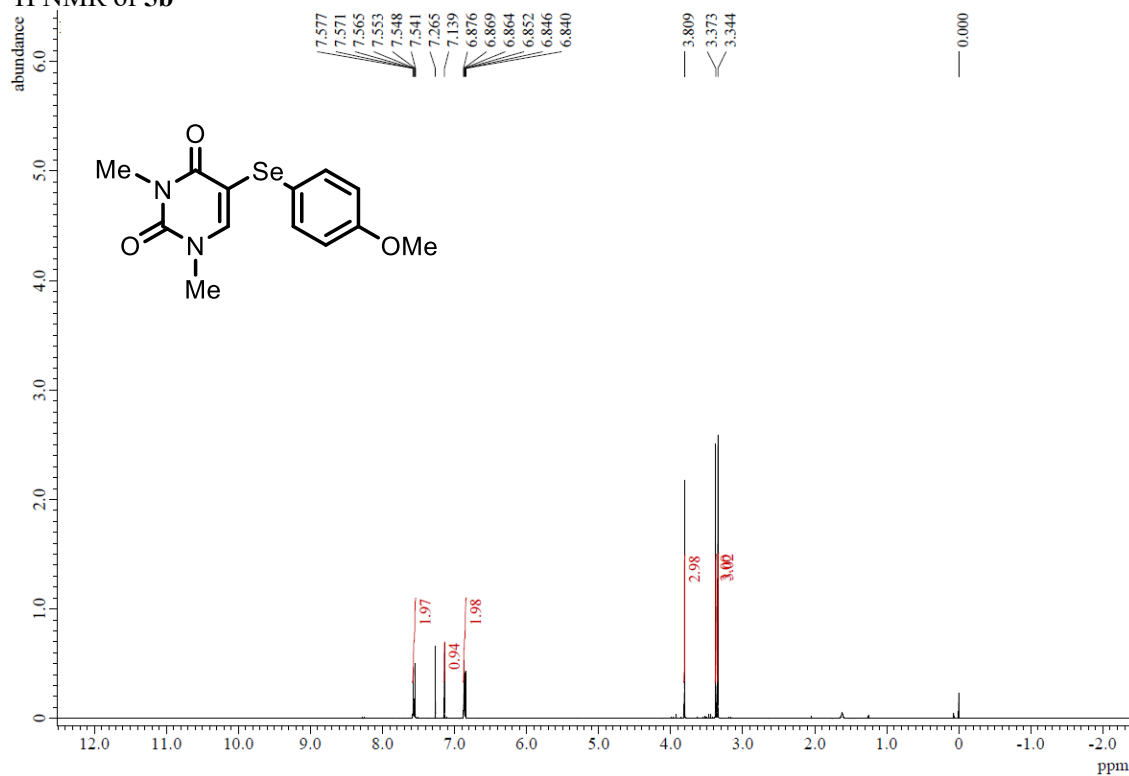

<sup>13</sup>C NMR of 5b

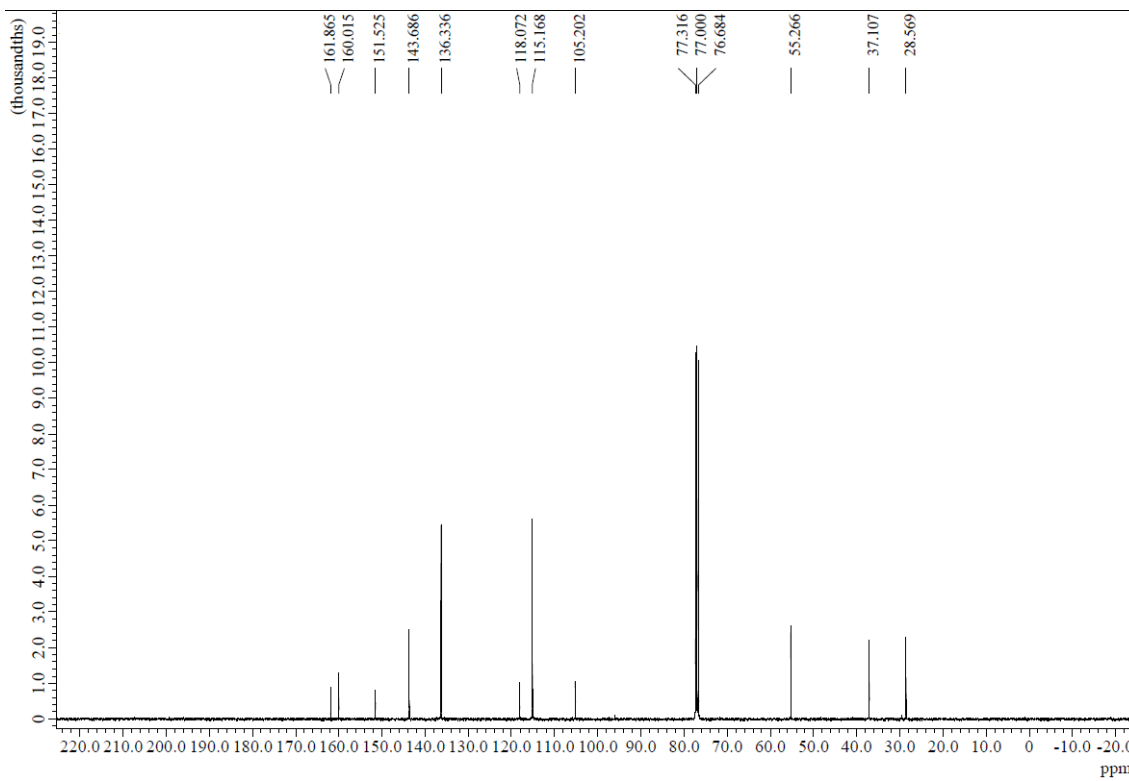

### <sup>1</sup>H NMR of 5c

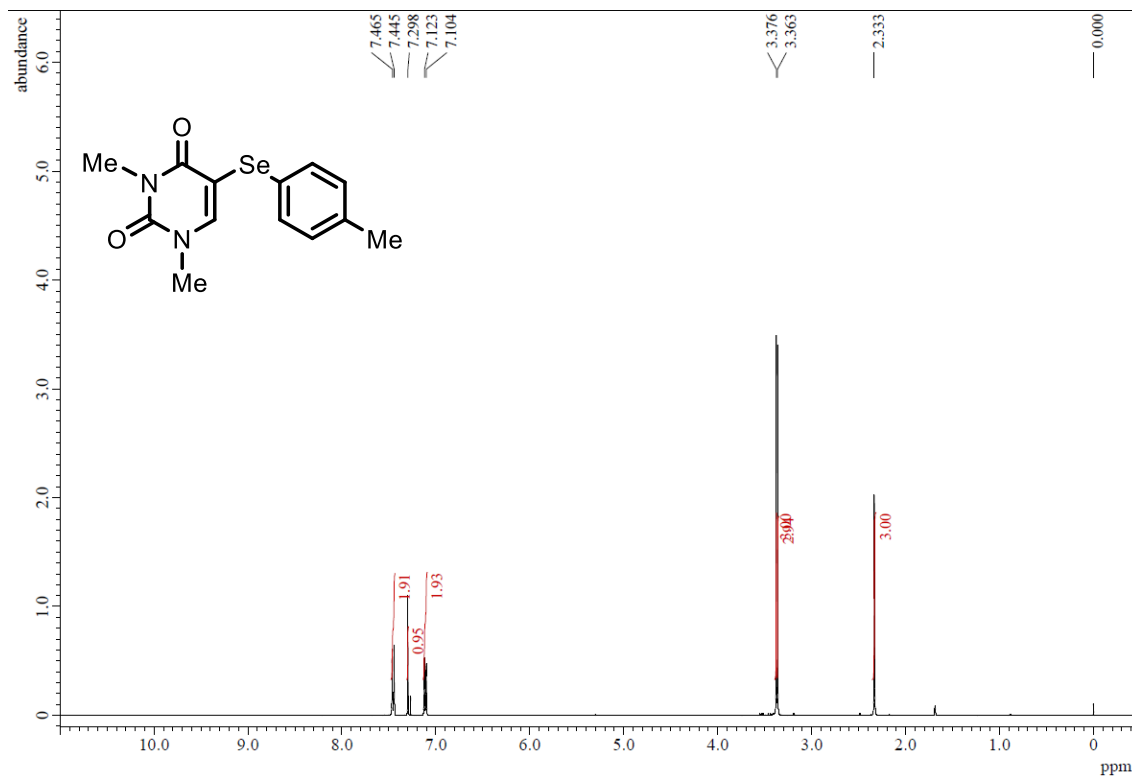

### <sup>13</sup>C NMR of 5c

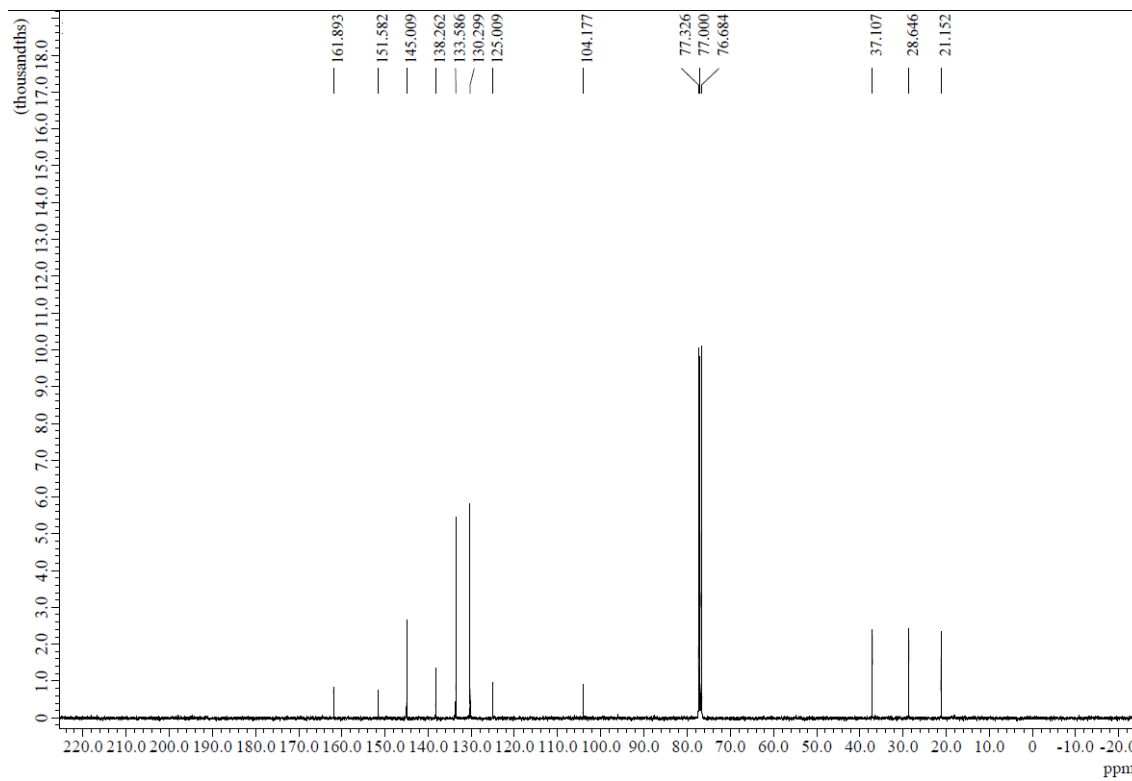

### <sup>1</sup>H NMR of 5d

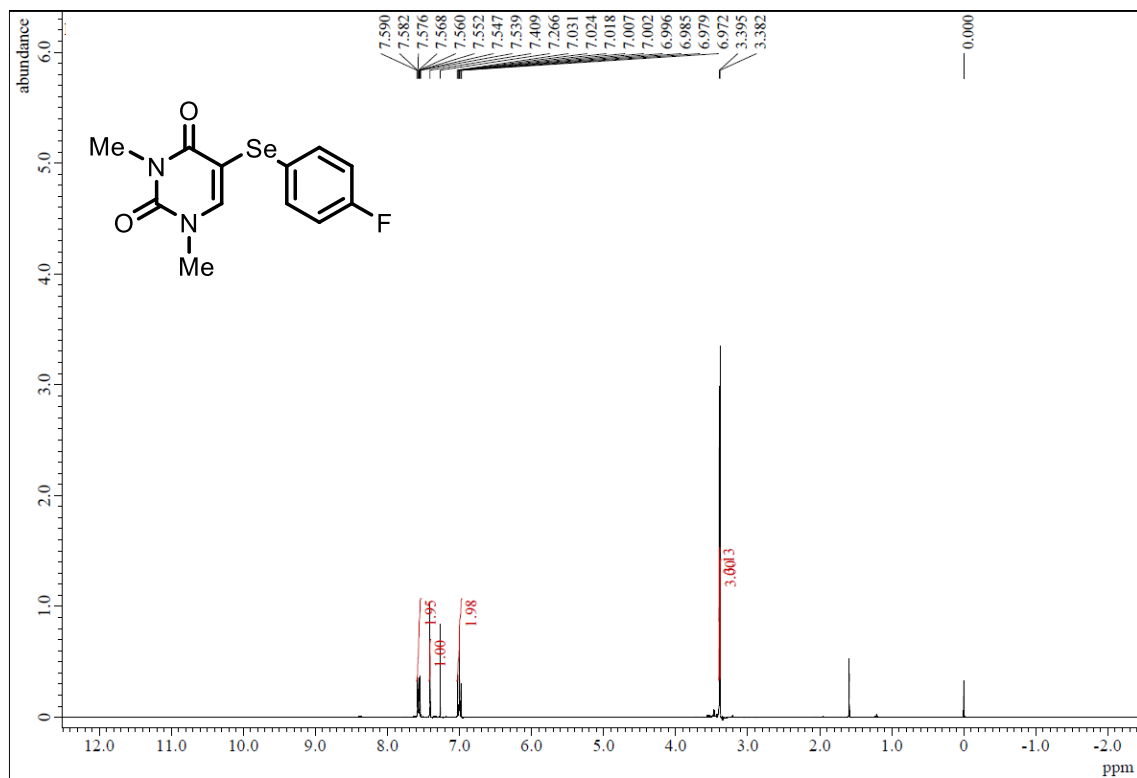

### <sup>13</sup>C NMR of 5d

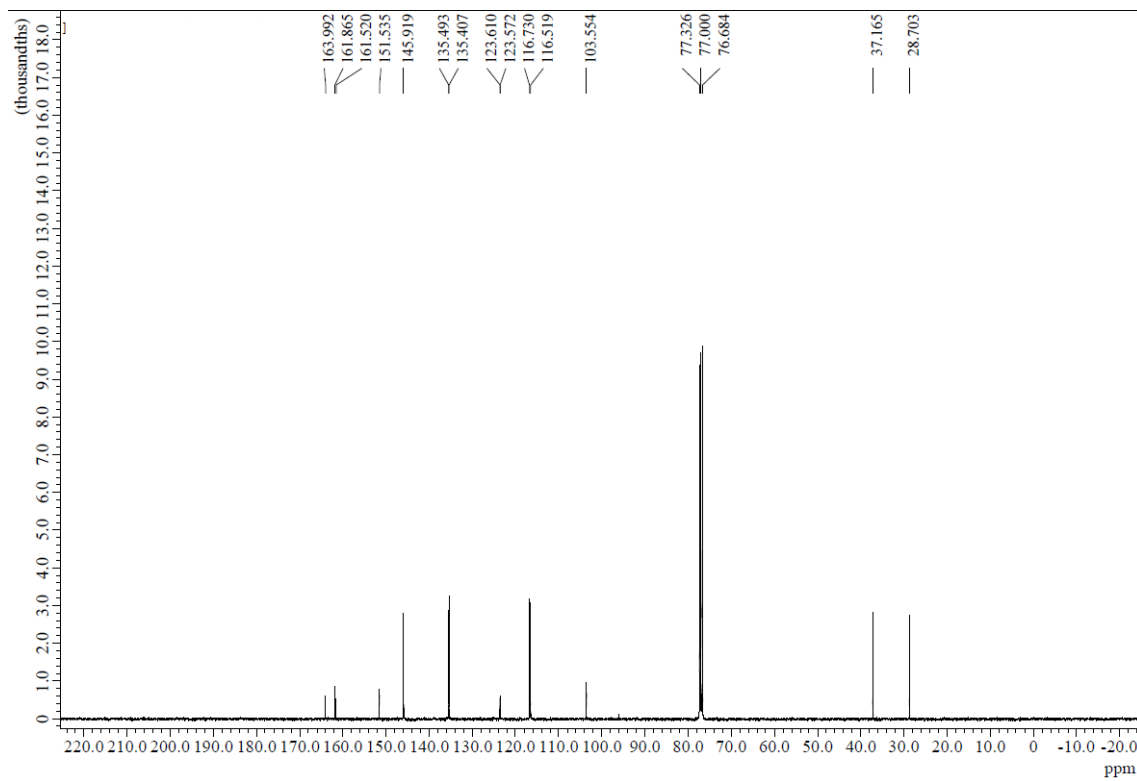



<sup>1</sup>H NMR of 5e

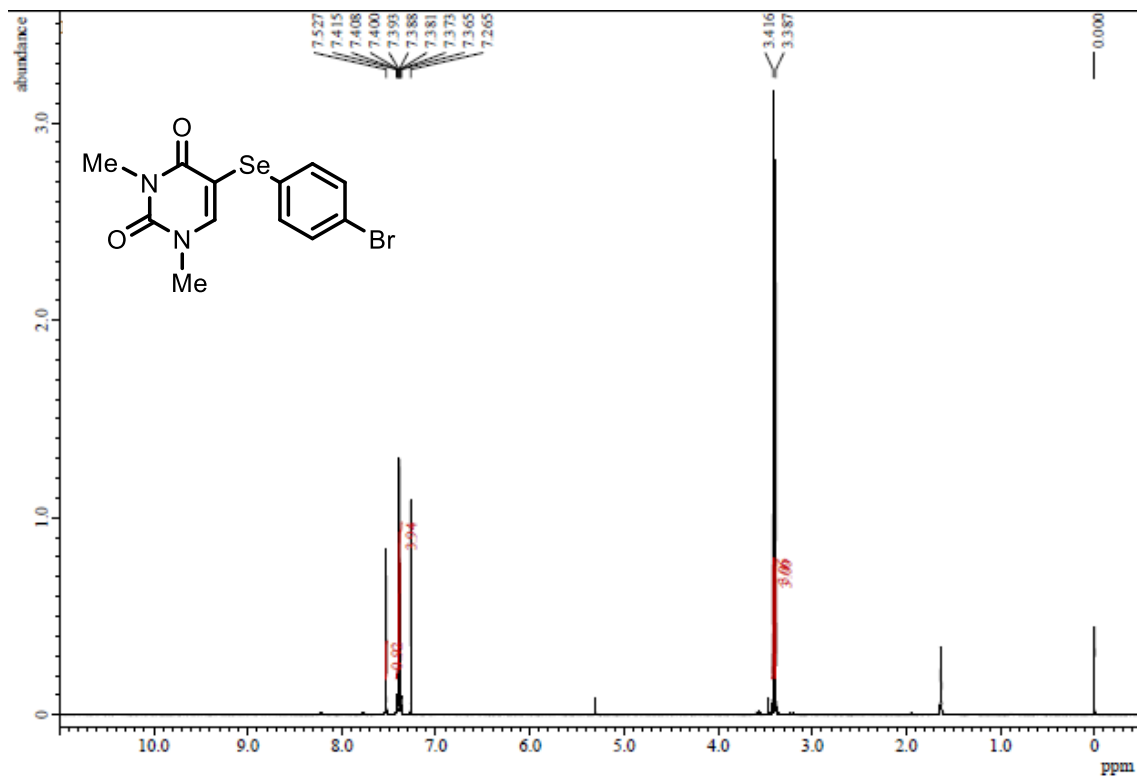

<sup>13</sup>C NMR of 5e

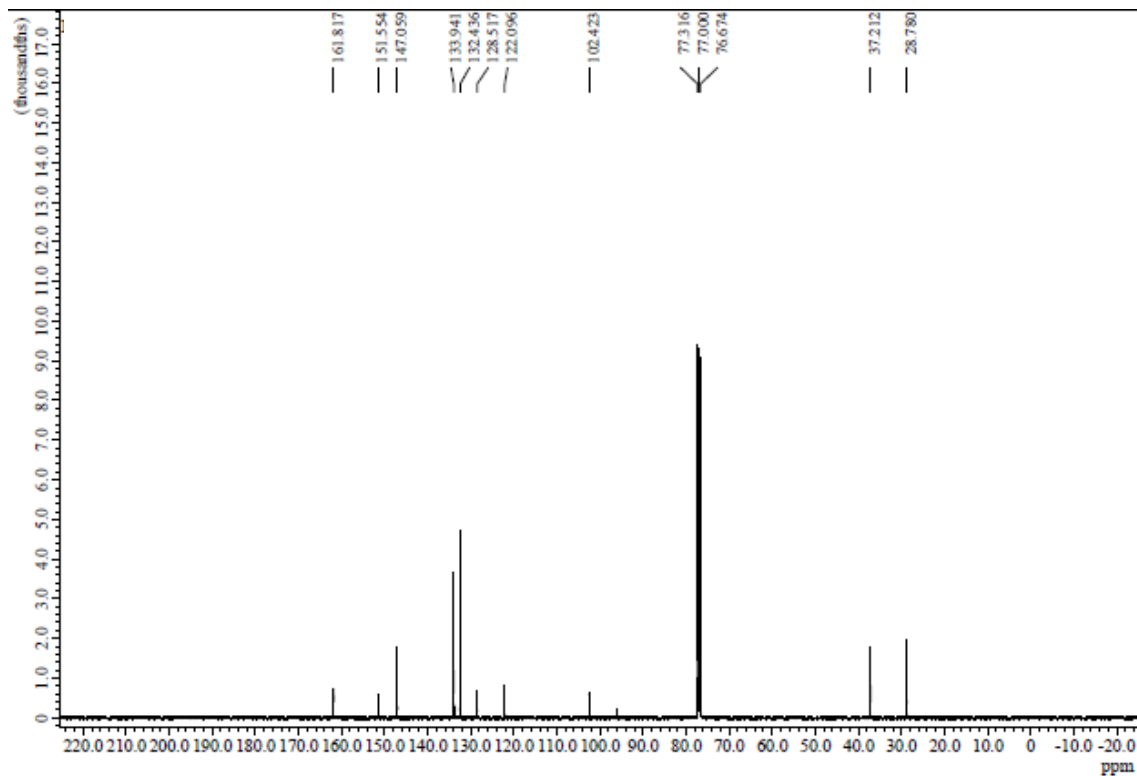

<sup>1</sup>H NMR of **5f**

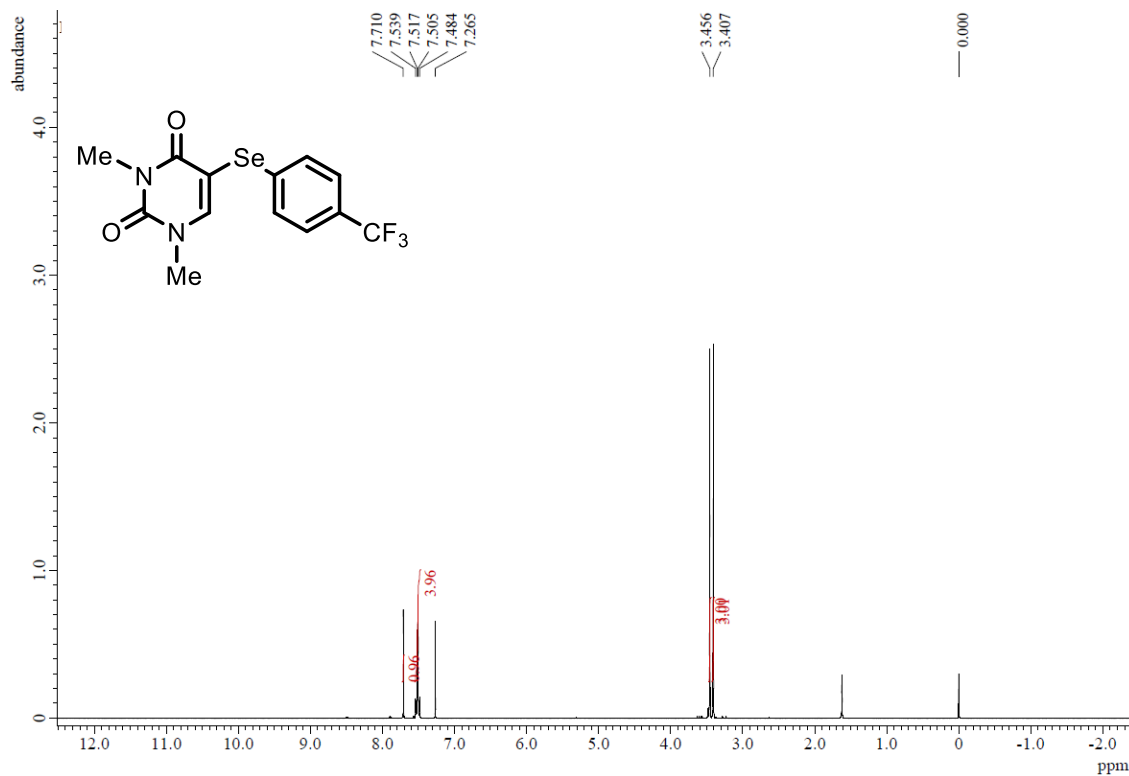

<sup>13</sup>C NMR of **5f**

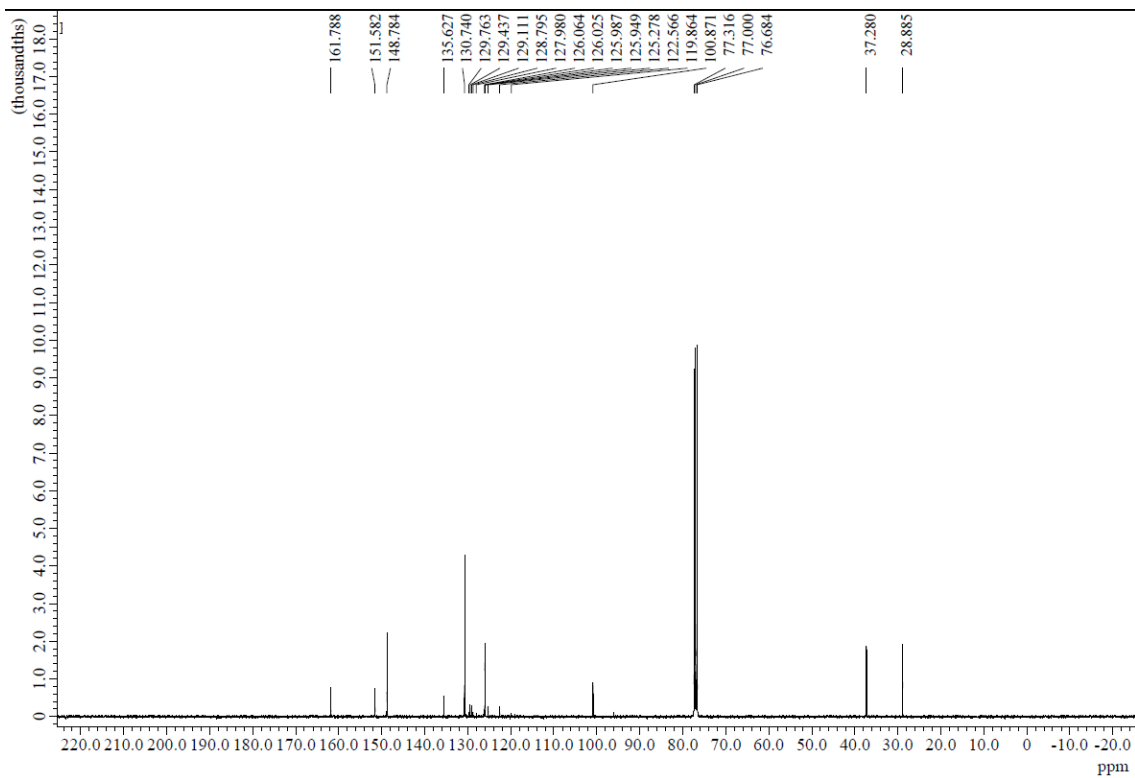

<sup>1</sup>H NMR of 5g

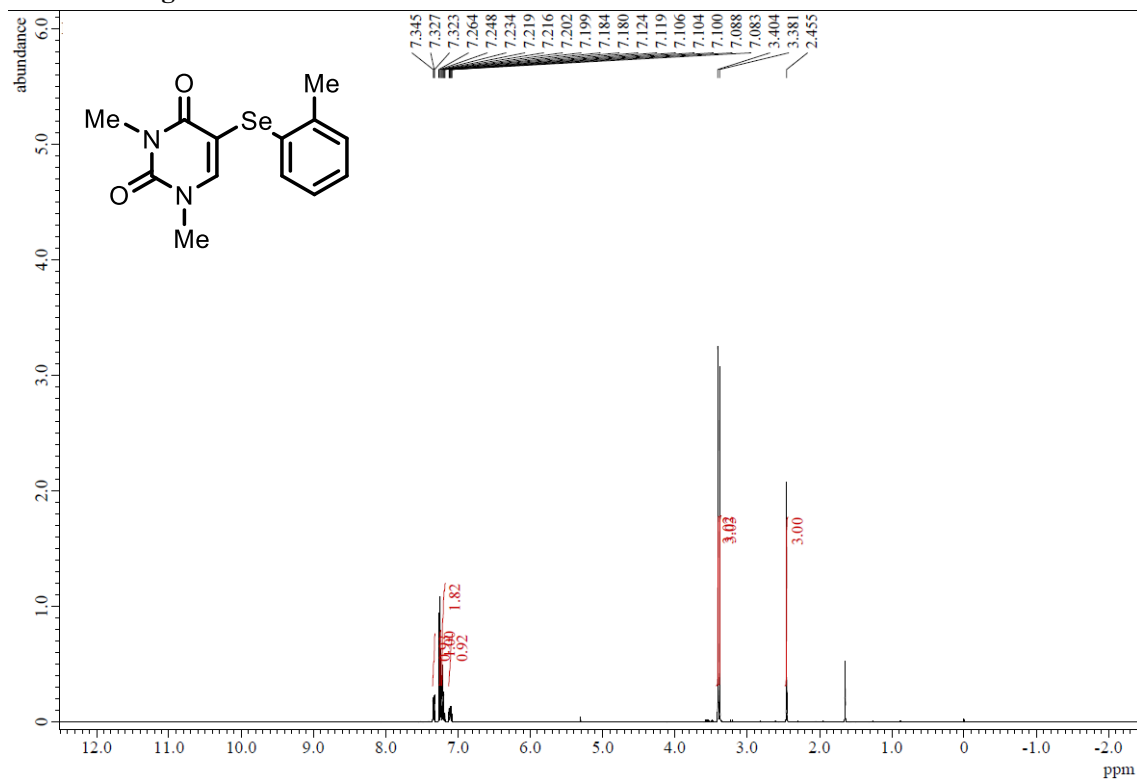

<sup>13</sup>C NMR of 5g

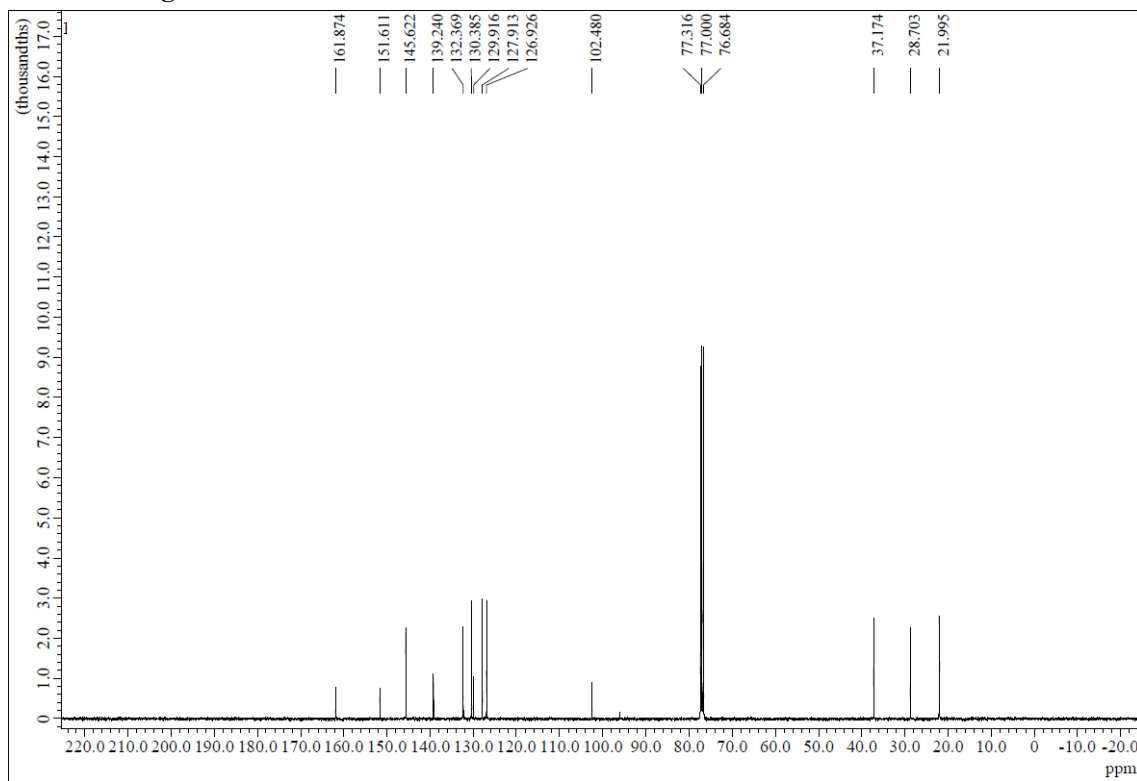

<sup>1</sup>H NMR of 5h

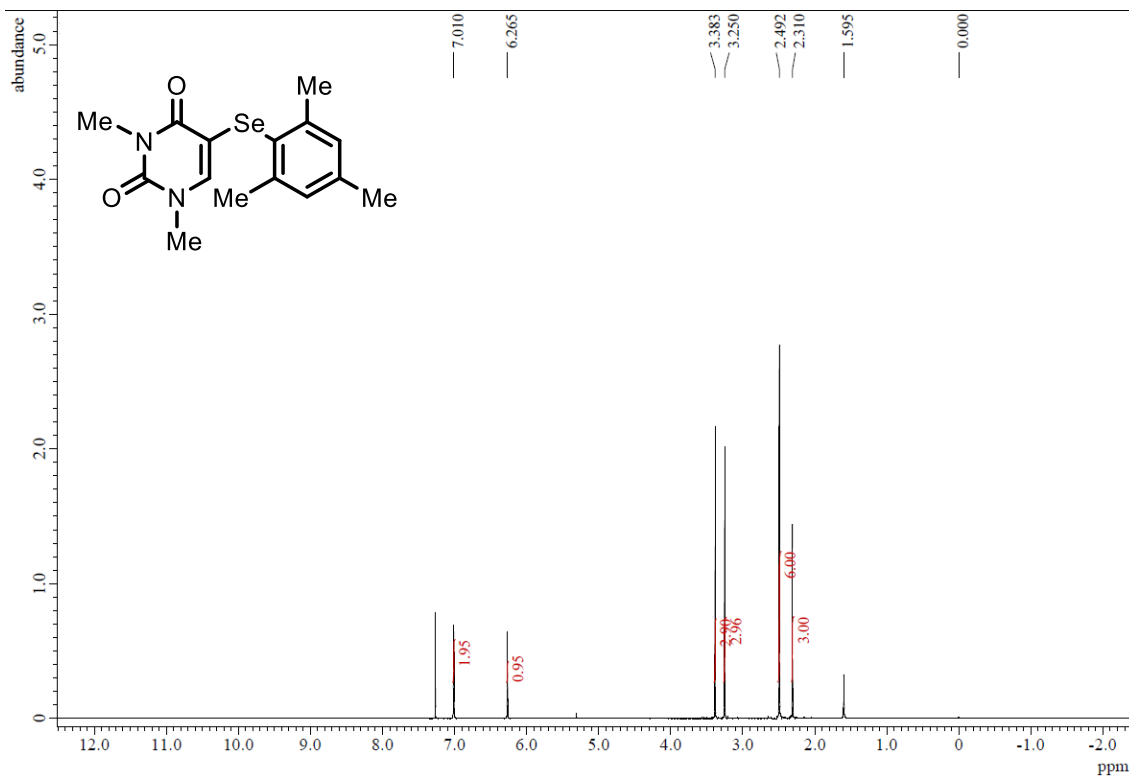

<sup>13</sup>C NMR of 5h

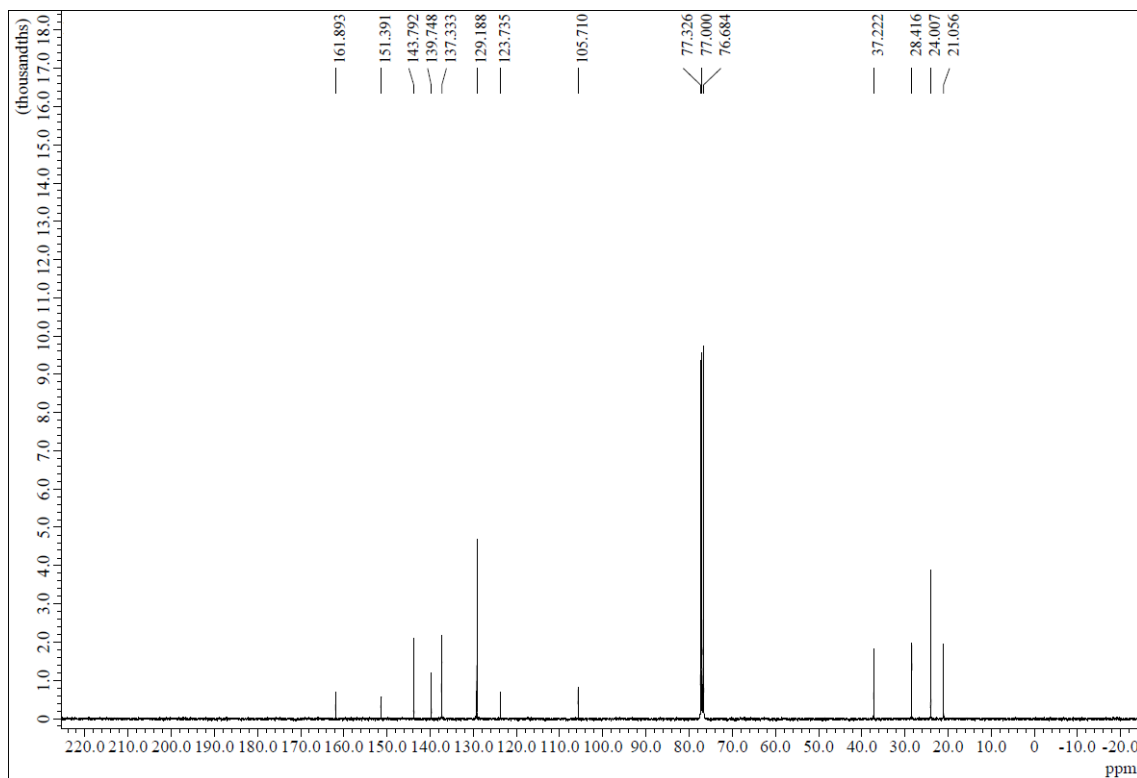

<sup>1</sup>H NMR of **5i**

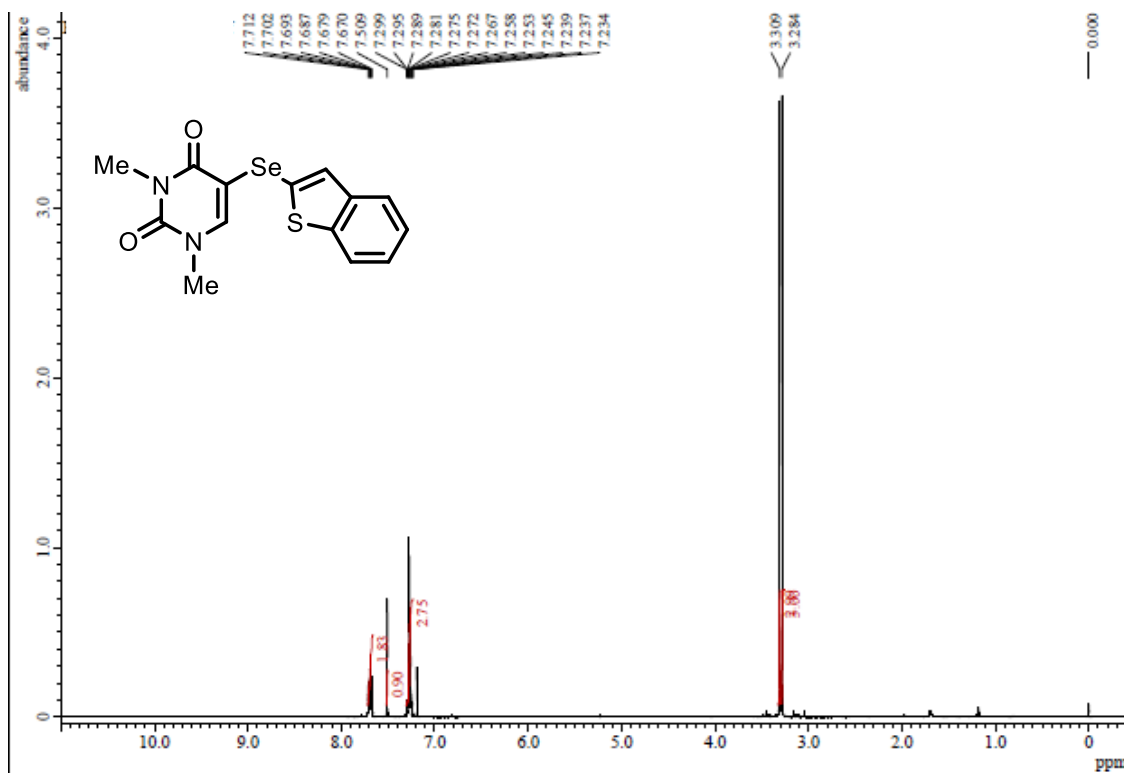

<sup>13</sup>C NMR of **5i**

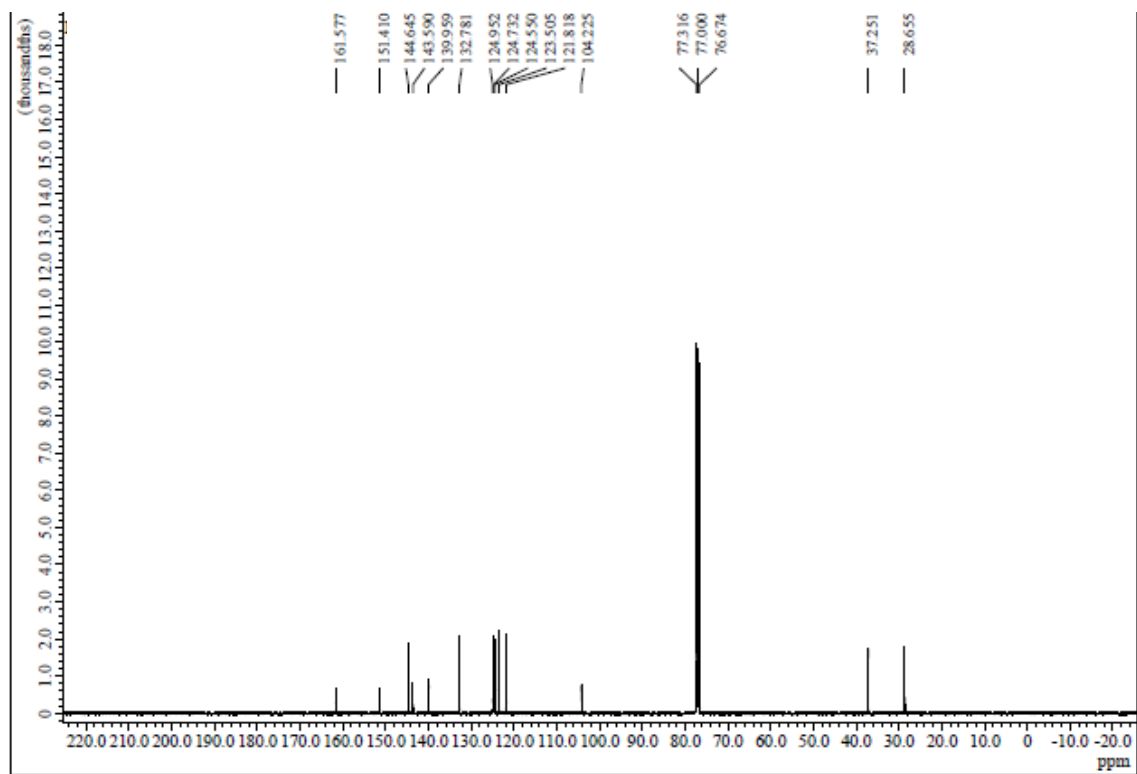

### <sup>1</sup>H NMR of 5m

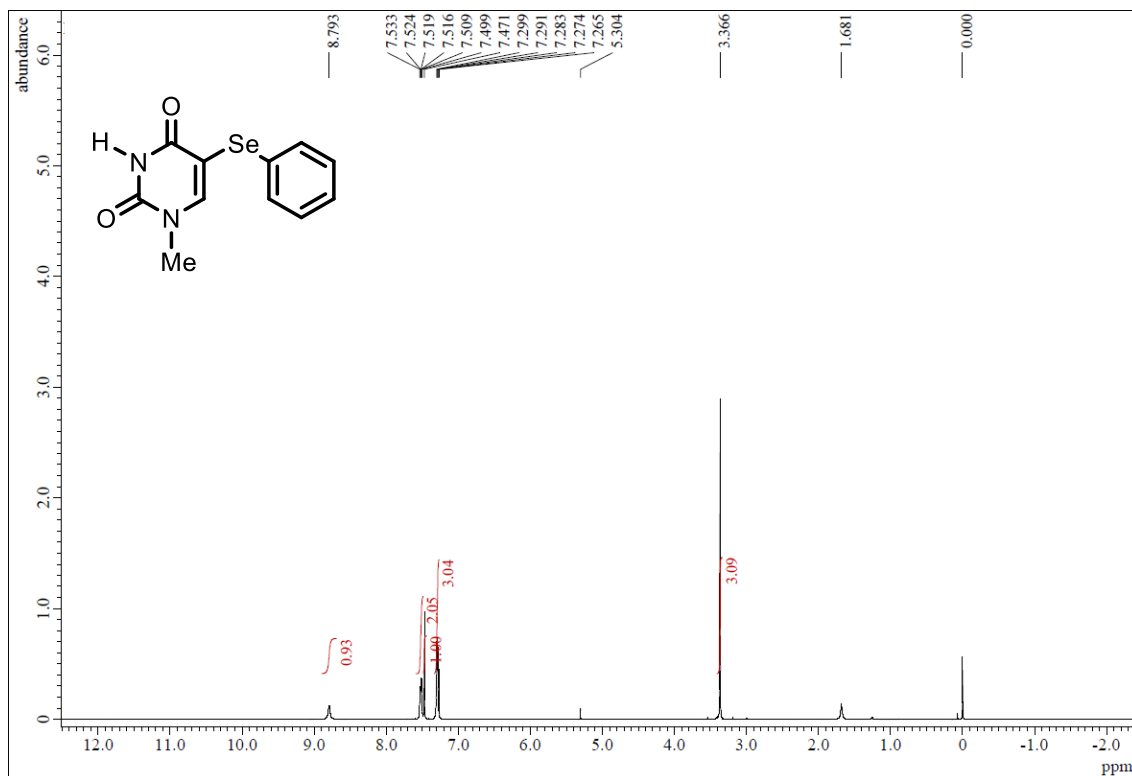

### <sup>13</sup>C NMR of 5m

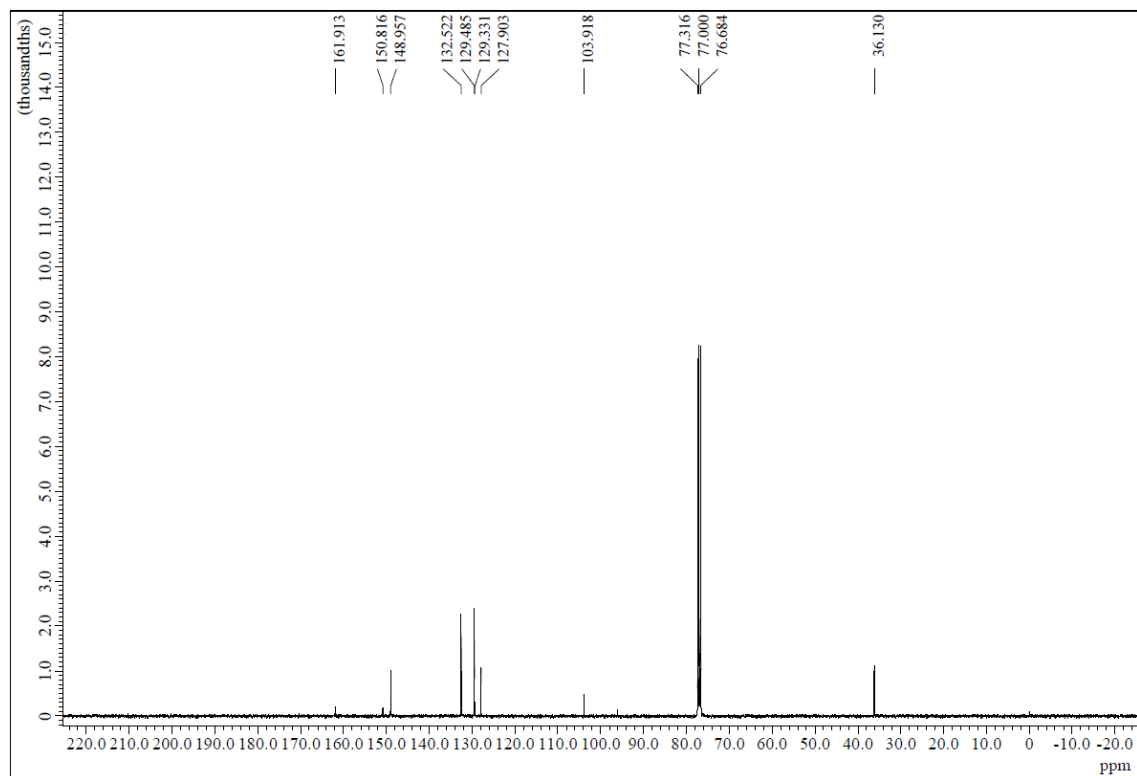

<sup>1</sup>H NMR of 5n

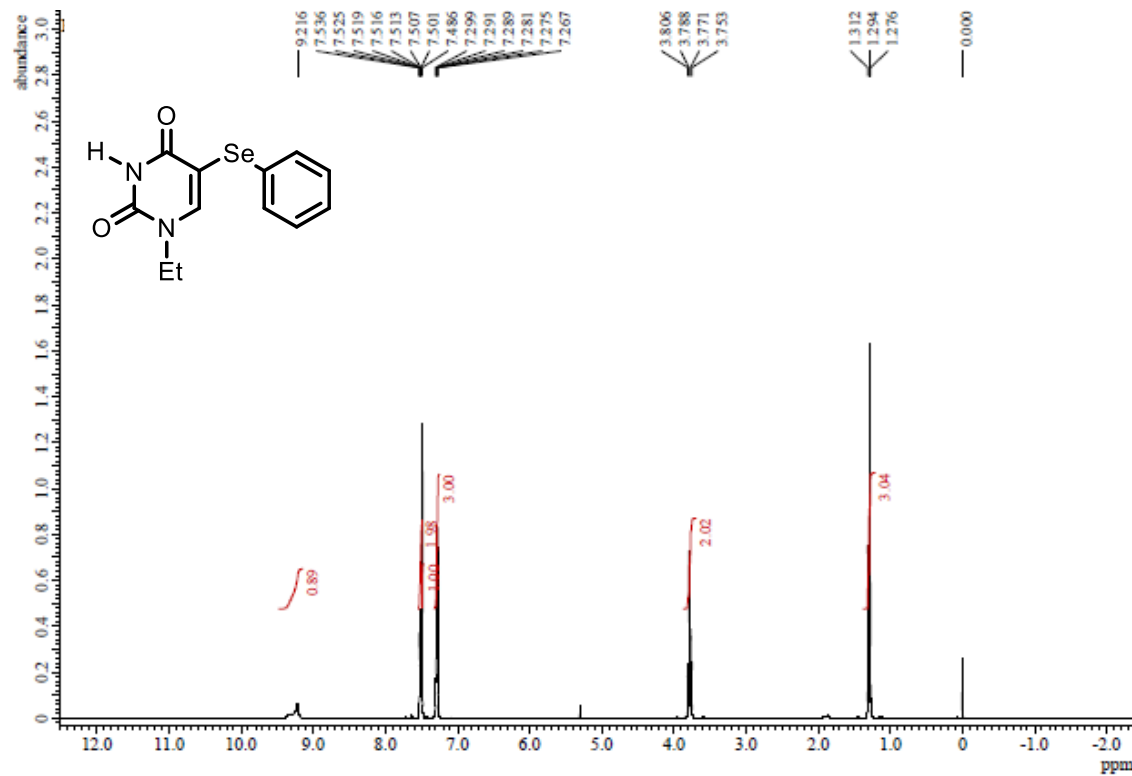

<sup>13</sup>C NMR of 5n

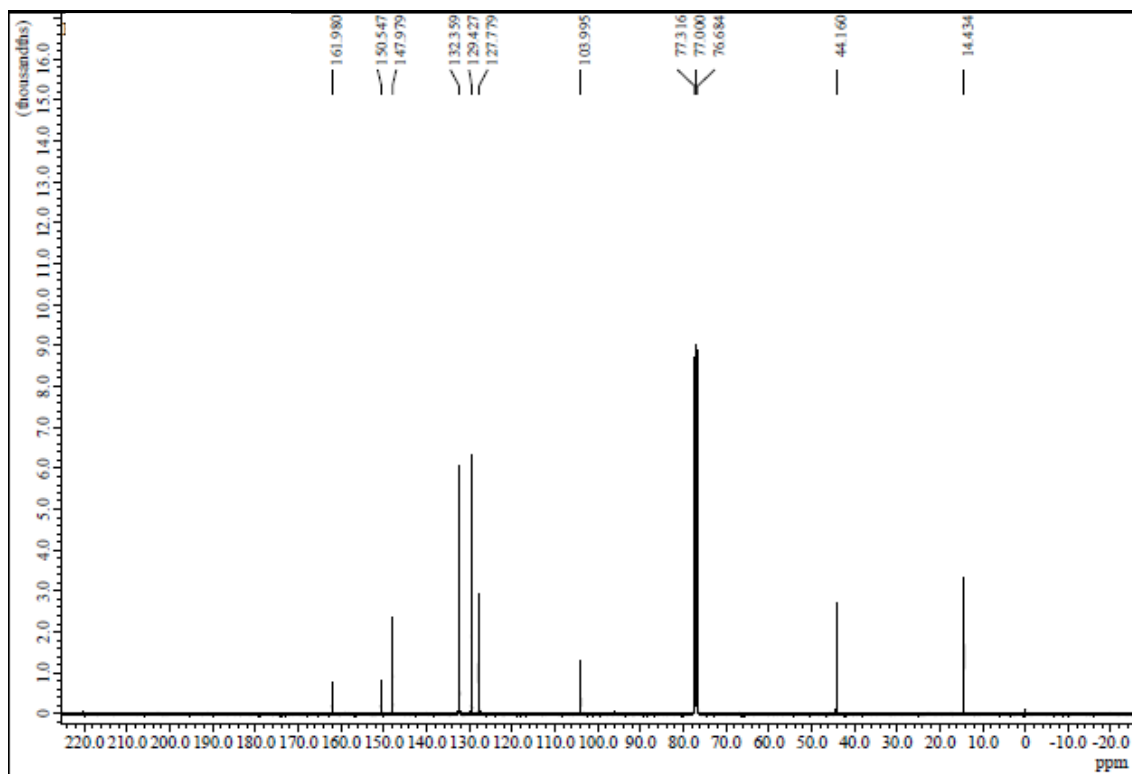

<sup>1</sup>H NMR of **50**

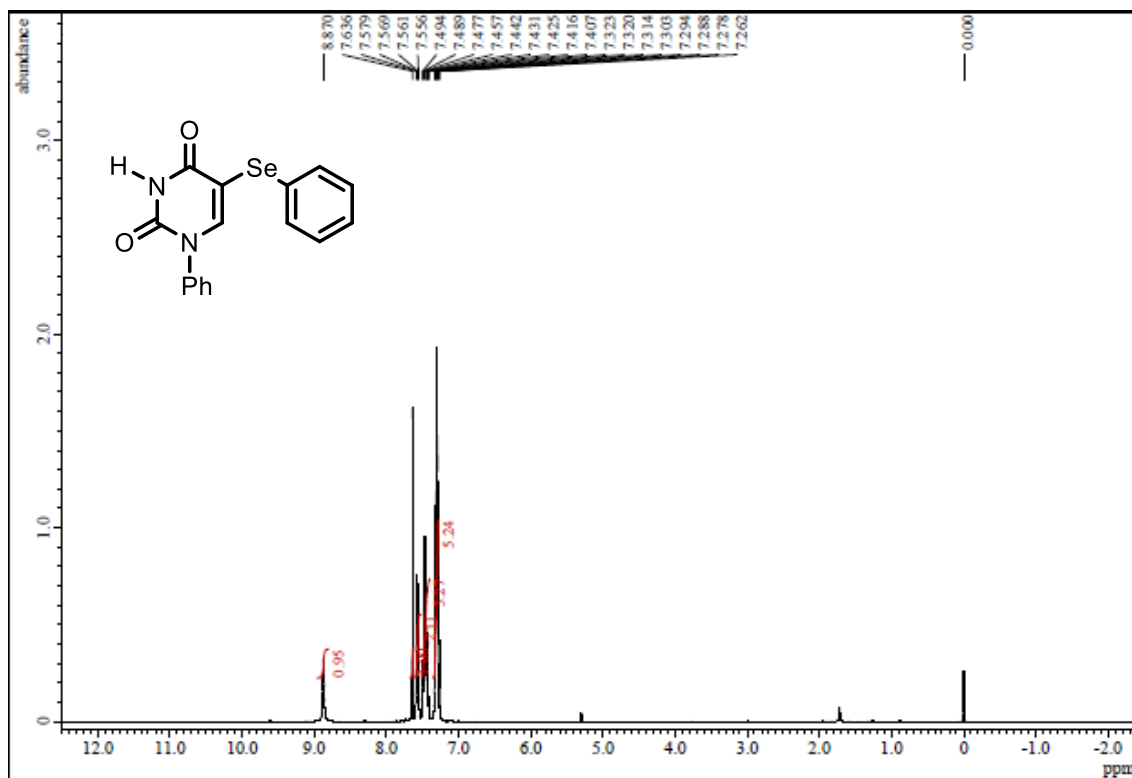

<sup>13</sup>C NMR of **50**

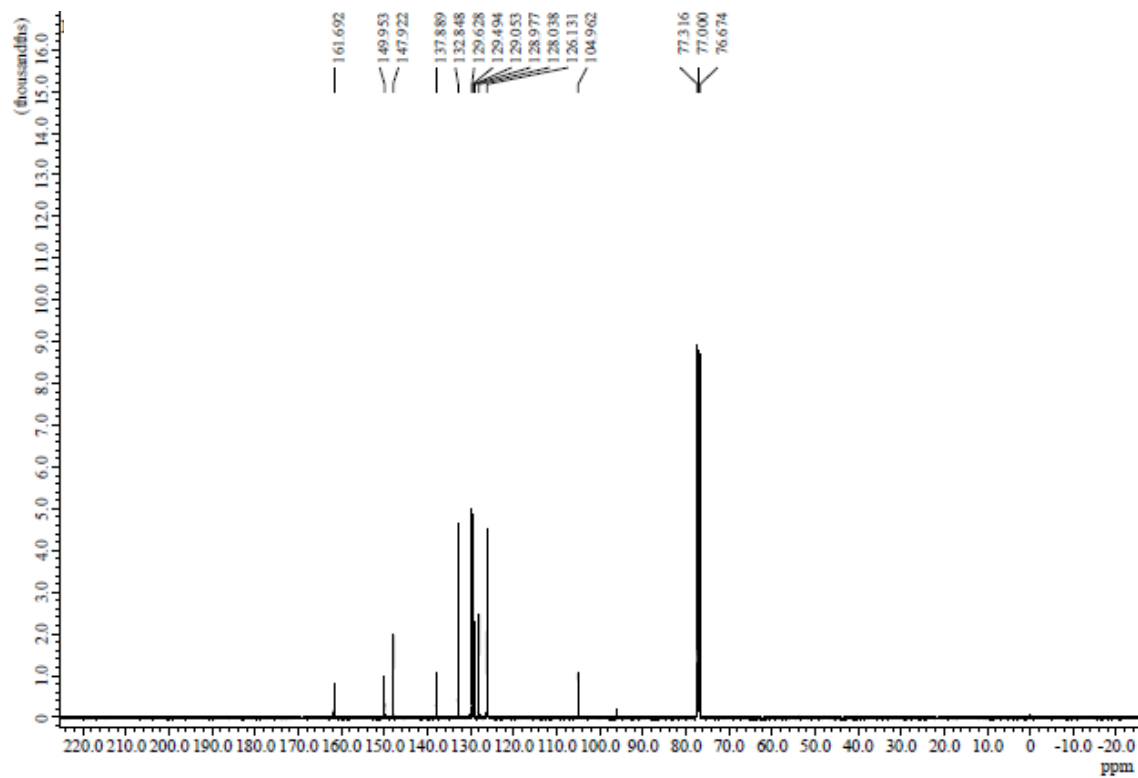



### <sup>1</sup>H NMR of 5p

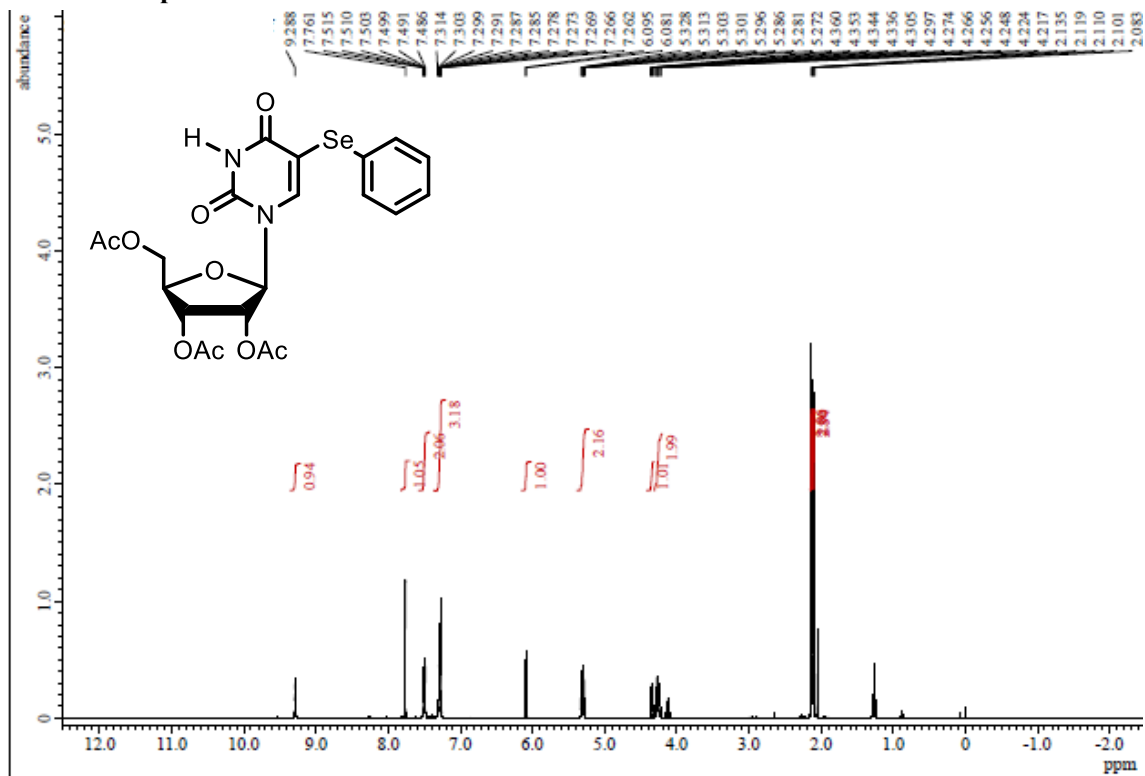

### <sup>13</sup>C NMR of 5p

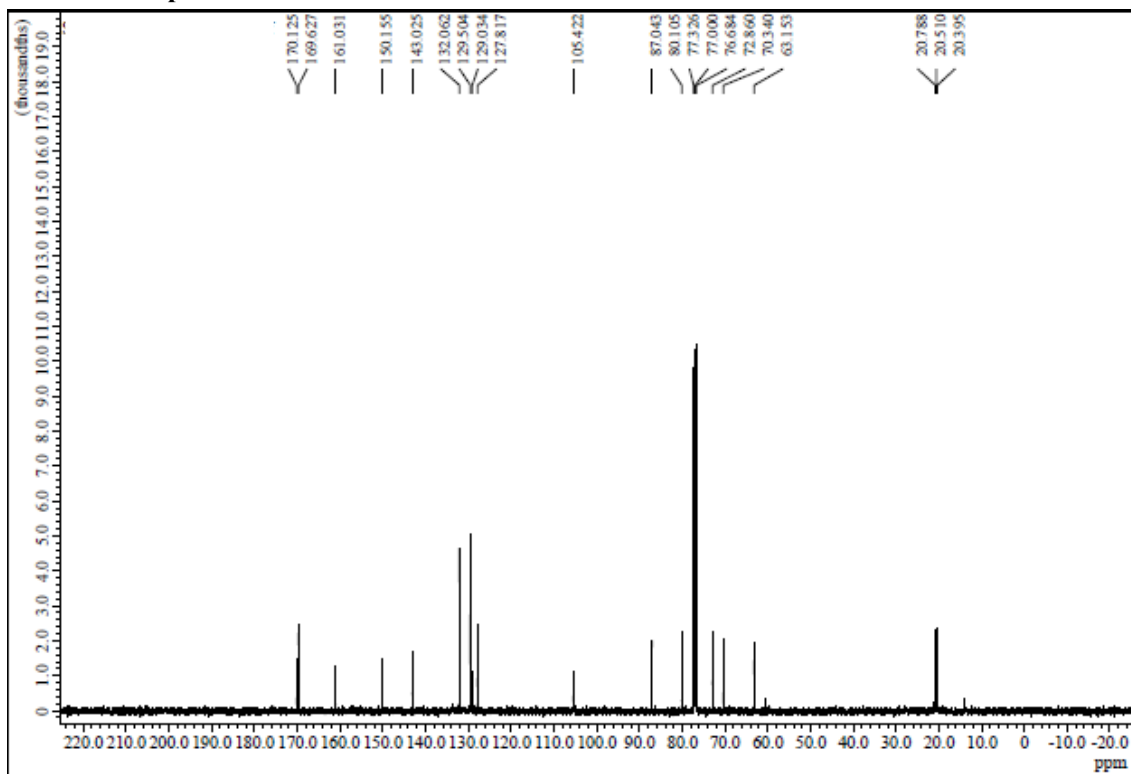

### <sup>1</sup>H NMR of 5q

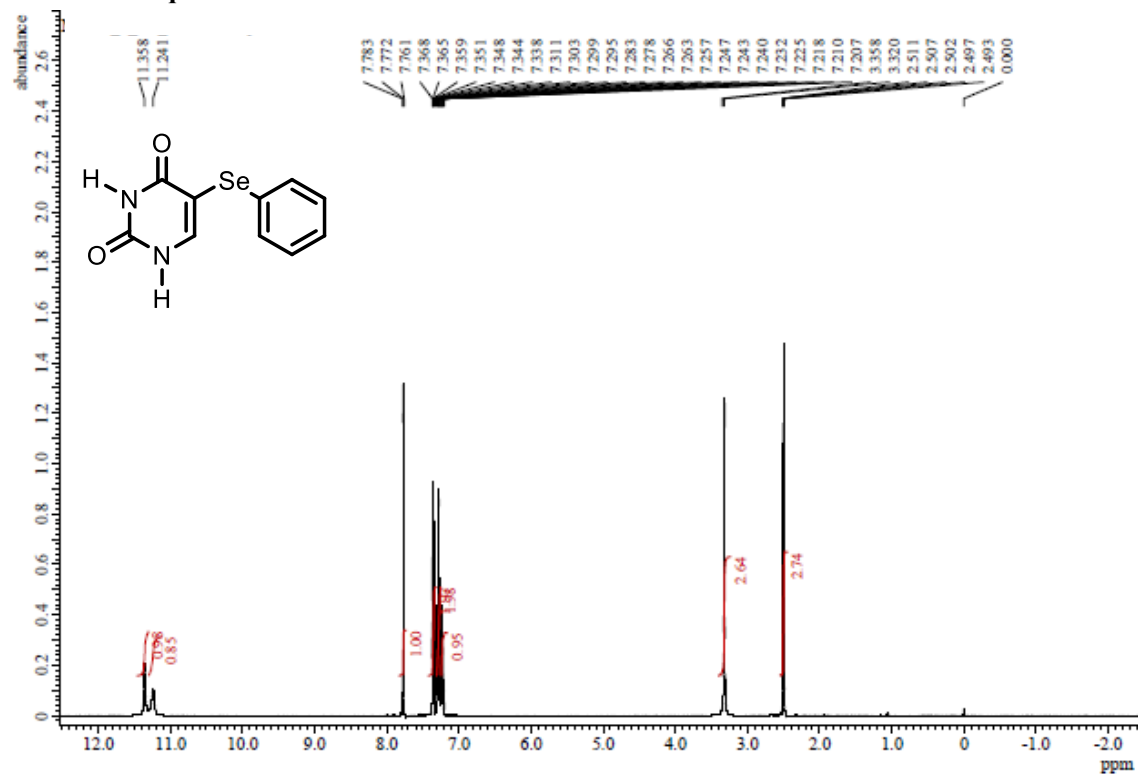

### <sup>13</sup>C NMR of 5q

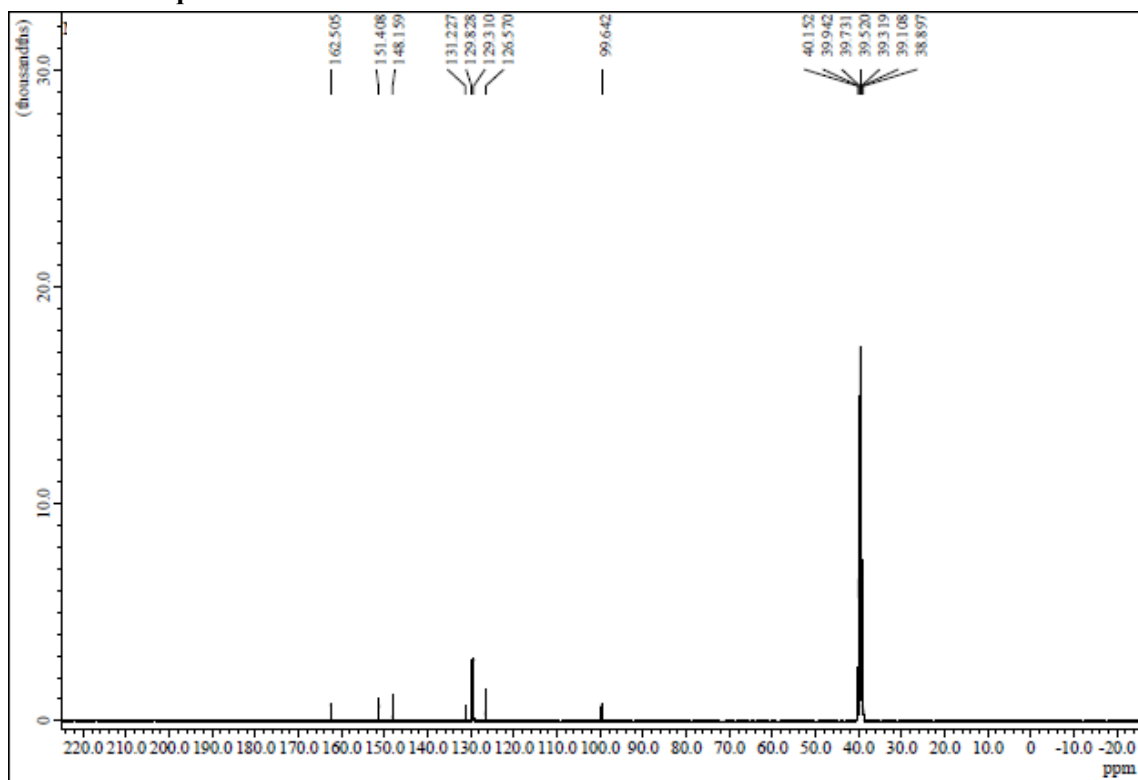

<sup>1</sup>H NMR of 5r

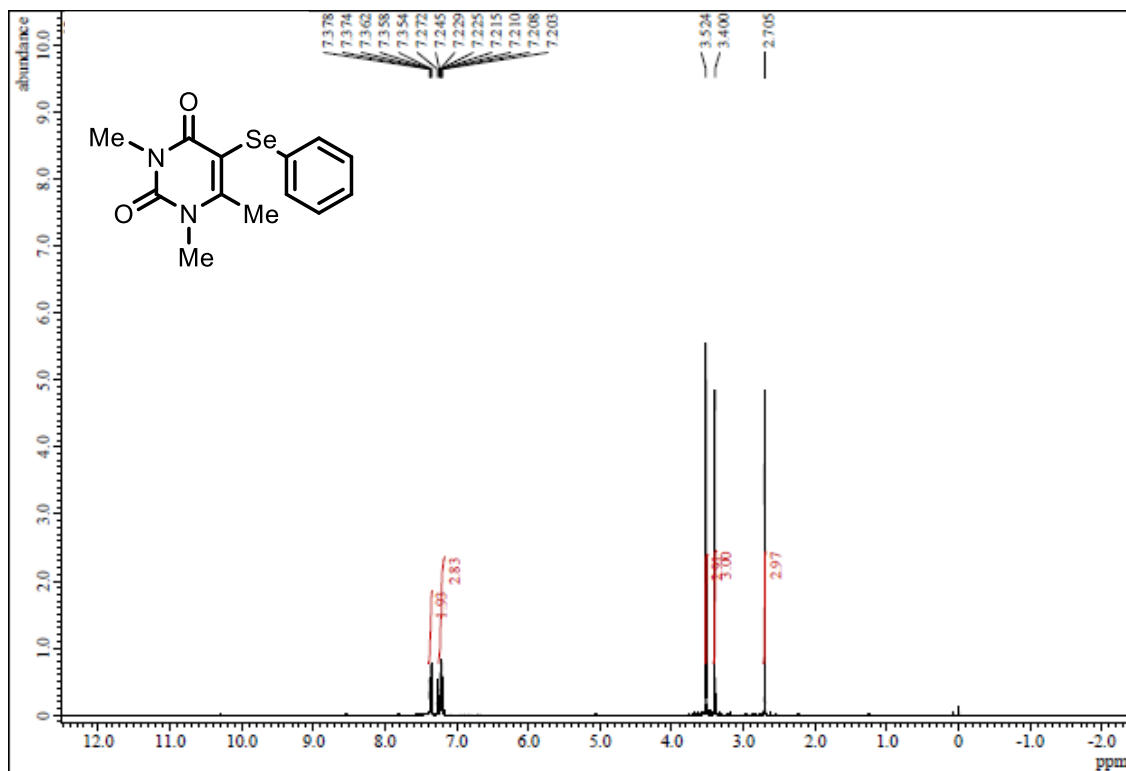

<sup>13</sup>C NMR of 5r

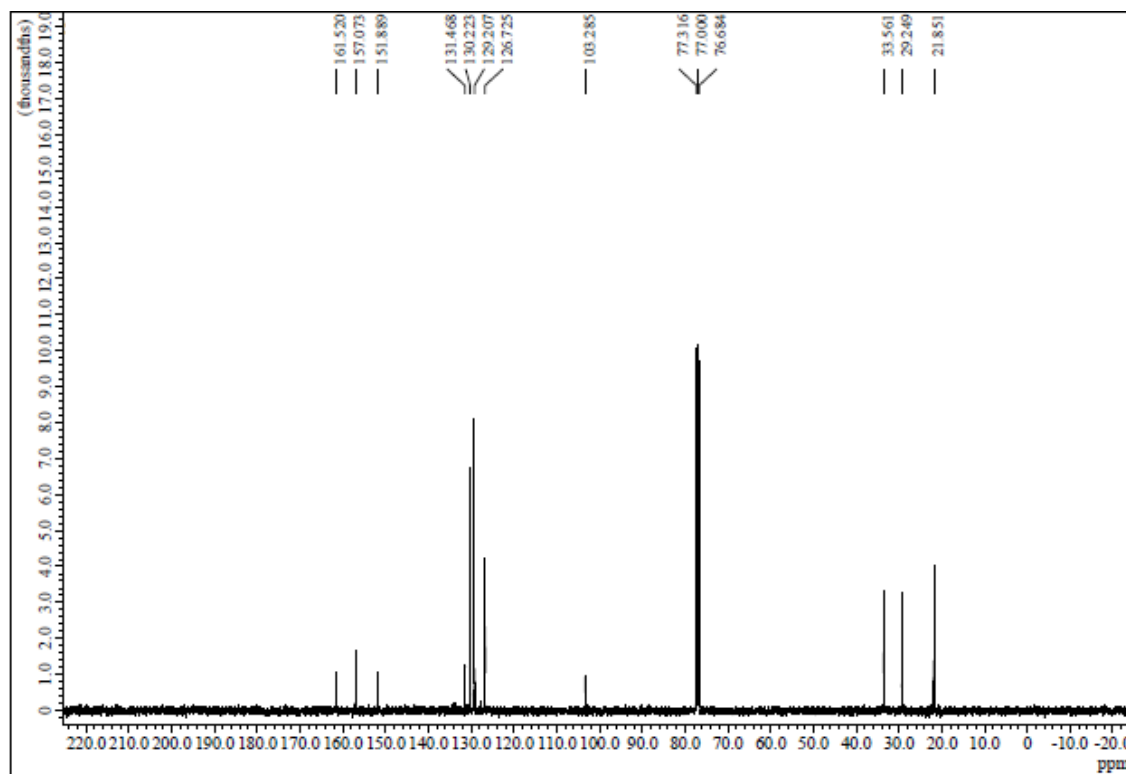

<sup>1</sup>H NMR of 5s

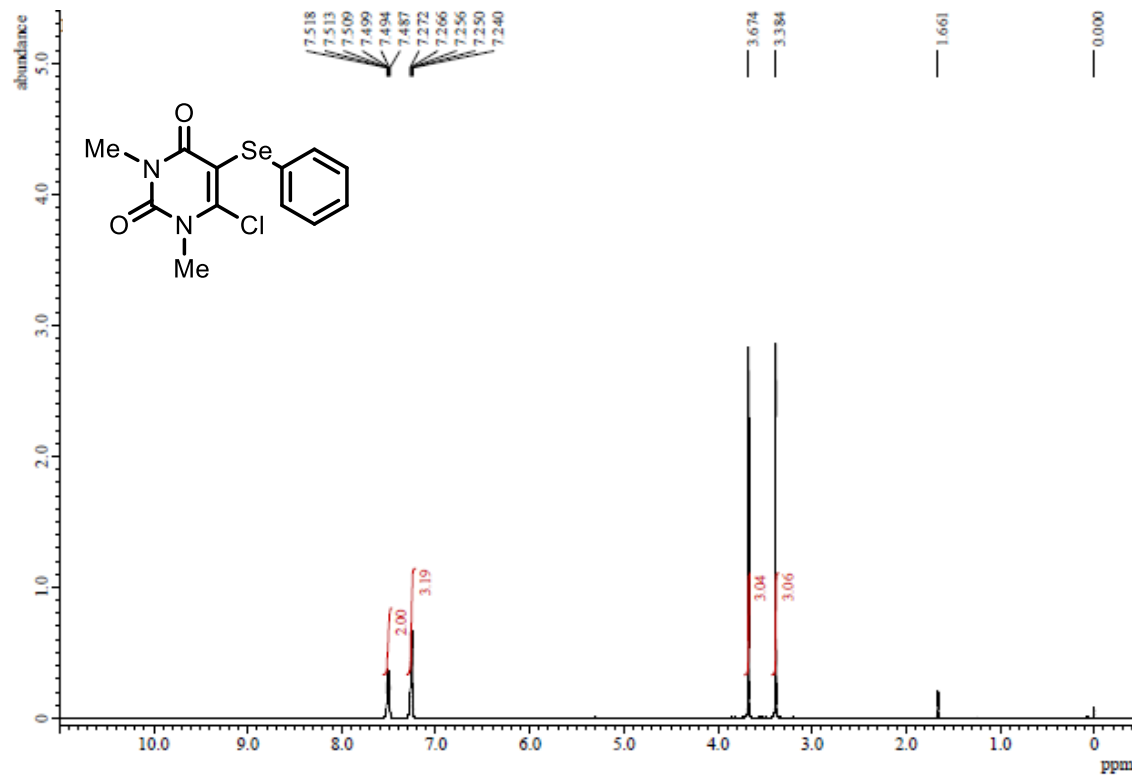

<sup>13</sup>C NMR of 5s

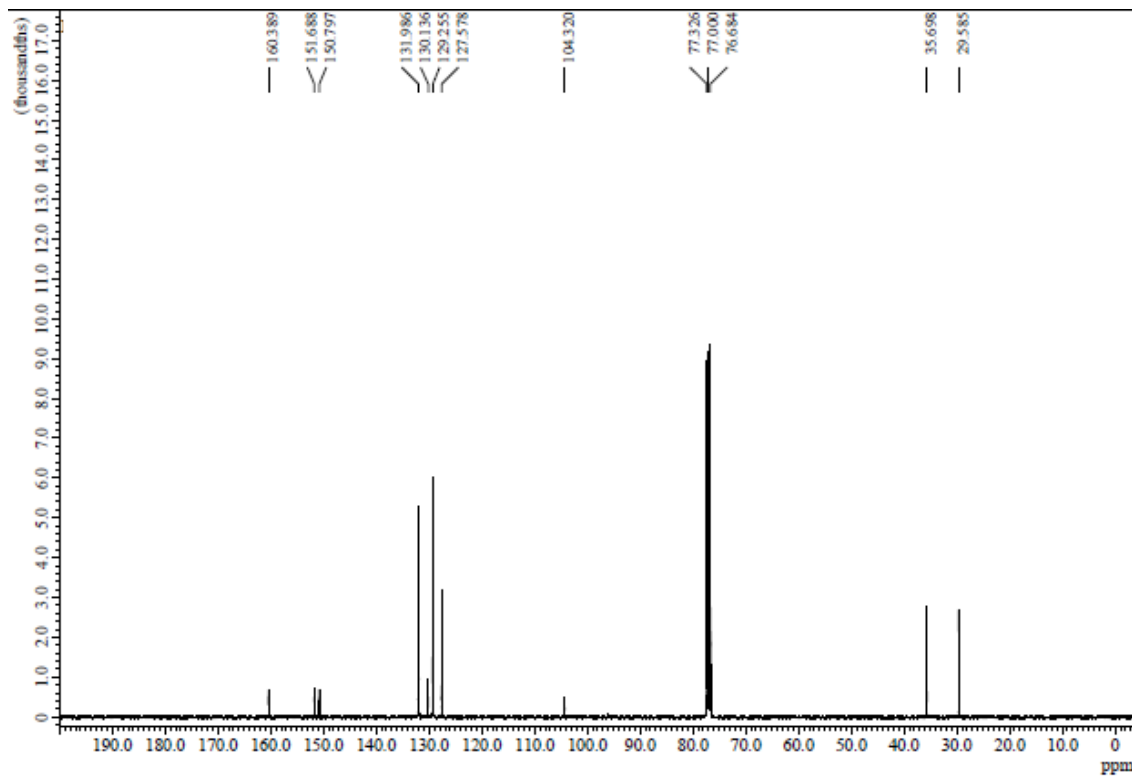

<sup>1</sup>H NMR of 5t

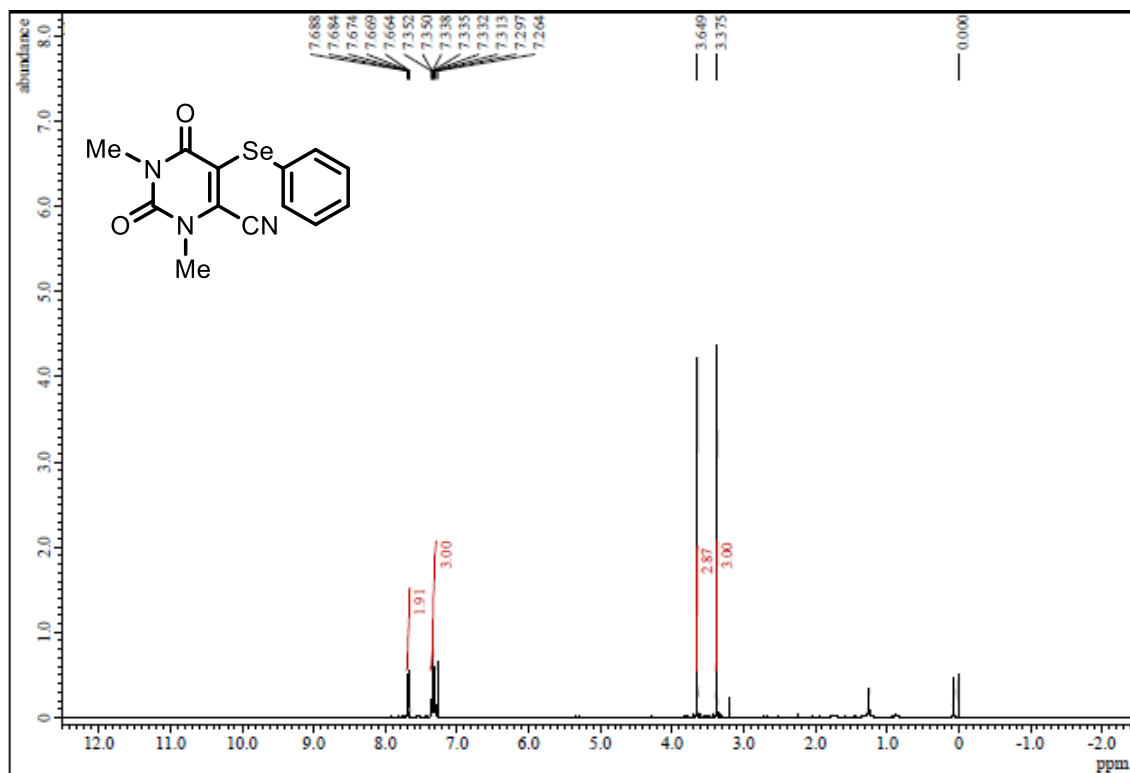

<sup>13</sup>C NMR of 5t

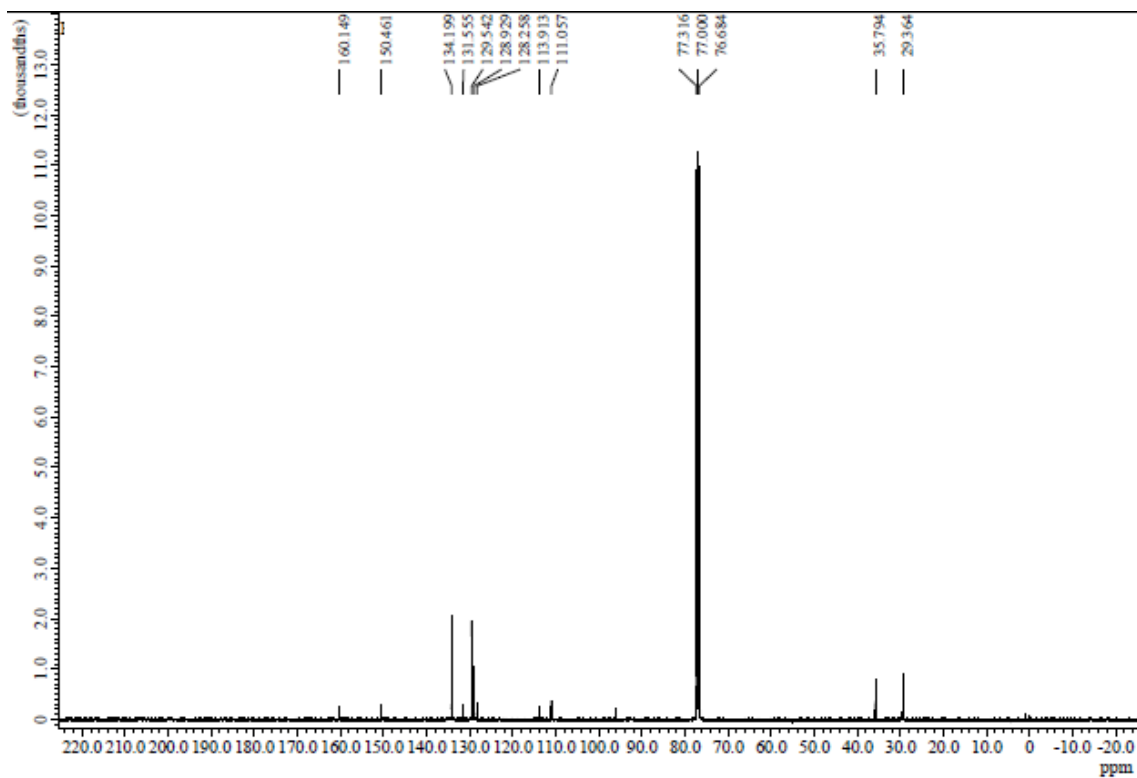

Supplement: d2ra01685k1.pdf [file d2ra01685k1.pdf]
